# Supplementary material for: Noncovalent functionalization of solid-state nanopores via self-assembly of amphipols
Source: Royal Society of Chemistry journal article supplement (doi:10.1039/c5nr08190d), 2015-12-17
Supplement: c5nr08190d1.pdf [file c5nr08190d1.pdf]

## Electronic Supporting information

### Noncovalent Functionalization of Solid-State Nanopores via Molecular Self-Assembly of Amphipols

Gonzalo Pérez-Mitta, Loïc Burr, Christina Trautmann, María Eugenia Toimil-Molares  
and Omar Azzaroni

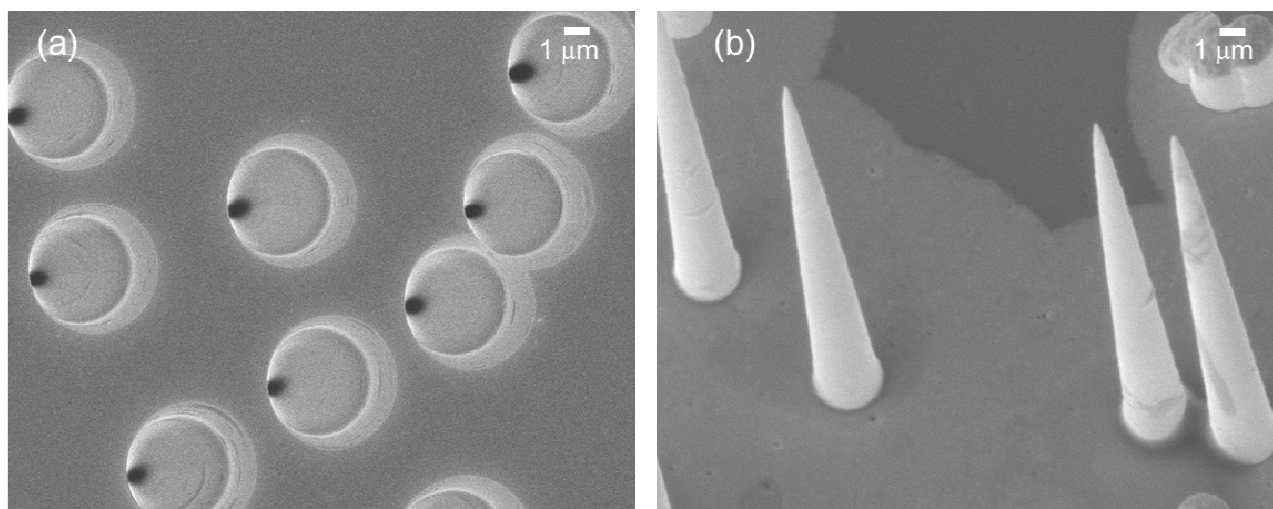

**Figure S1.** SEM images of (a) conical nanopores (b) Au nanocones made by the replica technique. The images were taken using (a) the lower detector (LEI) and (b) the upper detector (SEI).

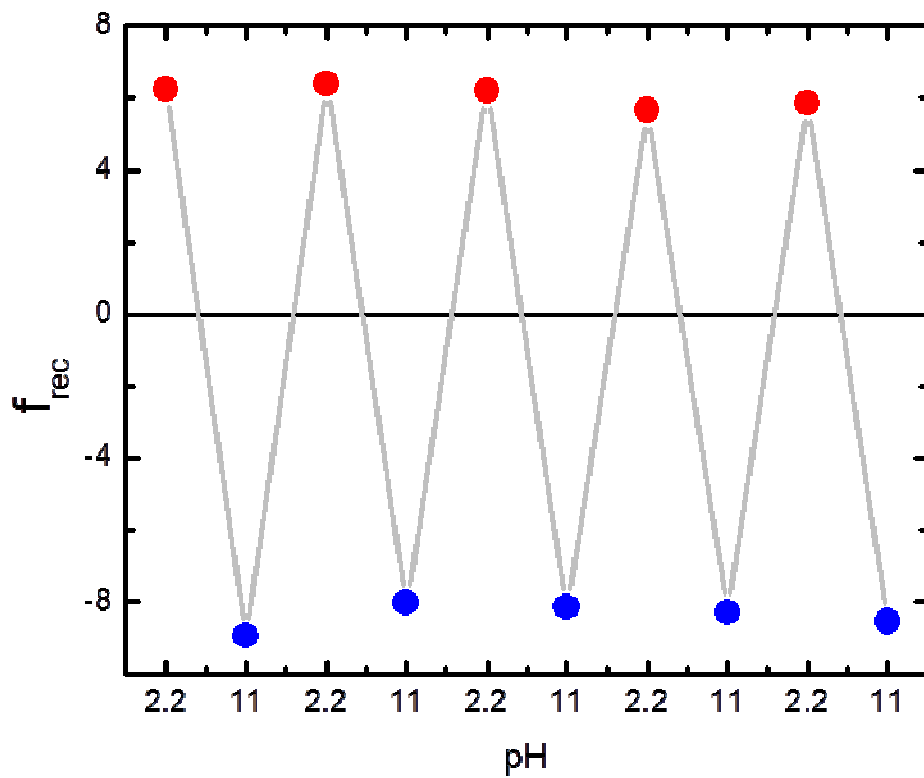

**Figure S2.** Reversibility test for a different nanochannel from the one used for figures 2 to 6 in the article.

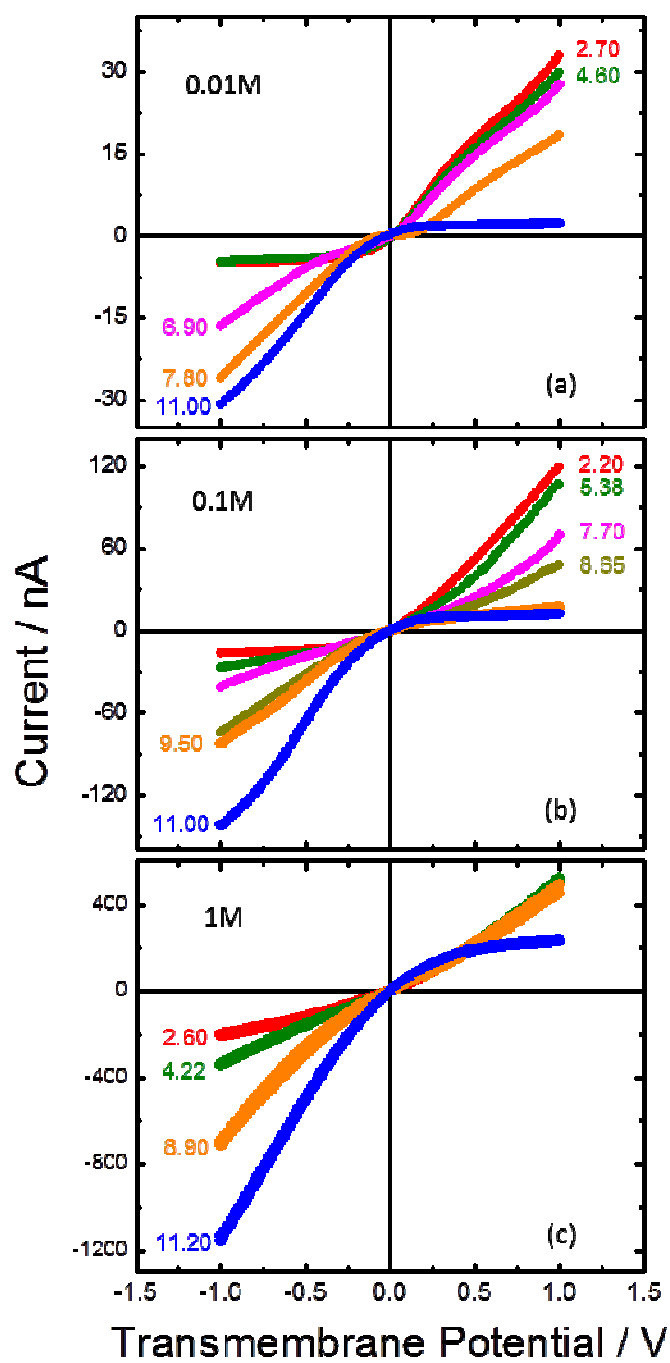

**Figure S3.** IV characteristics at different pHs changing the electrolyte concentration. (a) 0.01M (b) 0.1M (c) 1 M. The pH at which each curve was measured is reported next to the curve in the respective color. These curves were measured using a different nanopore from the one used for figures 2 to 6 in the article.
